# Supplementary material
Source: PubMed Central journal article supplement (PMC6817969)
Supplement: NIHMS991187-supplement-supplemental_table.pdf [file NIHMS991187-supplement-supplemental_table.pdf]

In the format provided by the authors and unedited.

# Microglia in neurodegeneration

Suzanne Hickman, Saef Izzy , Pritha Sen, Liza Morsett and Joseph El Khoury \*

---

Center for Immunology & Inflammatory Diseases, Massachusetts General Hospital, and Harvard Medical School, Boston, MA, USA.

\*e-mail: [jelkhoury@mgh.harvard.edu](mailto:jelkhoury@mgh.harvard.edu)

**Supplementary Table 1:**

**Trem2 variants associated with neurodegenerative diseases.**

| <b>TREM2 Variants Associated with Neurodegenerative Diseases</b> |                          |                                                                   |                             |                   |
|------------------------------------------------------------------|--------------------------|-------------------------------------------------------------------|-----------------------------|-------------------|
| <b>Variant</b>                                                   | <b>Effect on protein</b> | <b>Functional change</b>                                          | <b>Genotype</b>             | <b>References</b> |
| <b>Alzheimer's Disease</b>                                       |                          |                                                                   |                             |                   |
| 97C→A                                                            | Q33X                     | Truncated,<br>non-functional protein                              | Heterozygous                | 1, 2              |
| 140C → T                                                         | R47H                     | Impaired signaling<br>↓Lipoprotein binding<br>↓Lipoprotein uptake | Heterozygous                | 3 2 4, 5          |
| 185C → T                                                         | R62H                     | Impaired signaling<br>↓Lipoprotein binding<br>↓Lipoprotein uptake | Heterozygous                | 2, 5              |
| 295C → T                                                         | D87N                     | Enhanced signaling<br>↑ lipoprotein binding                       | ND                          | 6 5               |
| 496C →T                                                          | H157Y                    | Enhanced signaling<br>Increased shedding<br>(sTREM2)              | Heterozygous                | 5, 7 8            |
| 632C→T                                                           | L211P                    | Signaling equivalent to<br>WT                                     | Risk in African<br>American | 5, 9              |

|                            |                                  |                                                                                         |            |                       |
|----------------------------|----------------------------------|-----------------------------------------------------------------------------------------|------------|-----------------------|
|                            |                                  |                                                                                         |            |                       |
| <b>Nasu-Hakola Disease</b> |                                  |                                                                                         |            |                       |
| 40G →T                     | E14X                             | Truncated,<br>non-functional protein                                                    | Homozygous | <sup>10</sup>         |
| 97C → A                    | Q33X                             | Truncated,<br>non-functional protein                                                    | Homozygous | <sup>1</sup>          |
| 113A →G                    | Y38C                             | Misfolded protein,<br>impaired glycosylation<br>↓ surface expression,<br>↓ phagocytosis | Homozygous | <sup>11, 12, 13</sup> |
| 132G → A                   | W44X                             | Truncated, nonfunctional<br>protein                                                     | Homozygous | <sup>10</sup>         |
| 197C → T                   | T66M                             | Misfolded protein,<br>impaired glycosylation<br>↓ surface expression,<br>↓ phagocytosis | Homozygous | <sup>5, 11, 12</sup>  |
| 233G →A                    | W78X                             | Truncated,<br>non-functional protein                                                    | Homozygous | <sup>10</sup>         |
| 377T →G                    | V126G                            | Impaired Glycosylation<br>Impaired maturation<br>↓ surface expression                   | Homozygous | <sup>1, 14</sup>      |
| 401A→G                     | D134G                            | ↓Surface expression                                                                     | Homozygous | <sup>1, 14</sup>      |
| 267delG                    | Frameshift,<br>premature<br>stop | Non-functional protein                                                                  | Homozygous | <sup>1</sup>          |

|                         |                                           |                                                               |                                                   |                      |
|-------------------------|-------------------------------------------|---------------------------------------------------------------|---------------------------------------------------|----------------------|
| 313delG                 | Frameshift,<br>premature<br>stop          | Non-functional protein                                        | Homozygous                                        | <sup>1</sup>         |
| 482+2T→C                | Splice<br>mutation<br>(exon 3<br>missing) | Splice mutation<br>nonfunctional protein                      | Homozygous                                        | <sup>15</sup>        |
| 588G → A                | K186N                                     | No interaction with<br>DAP12                                  | Homozygous                                        | <sup>10, 14</sup>    |
| <b>FTD/FTLD Disease</b> |                                           |                                                               |                                                   |                      |
| 42 +<br>3delAGG         |                                           | Altered splicing<br>↓ protein                                 | Homozygous                                        | <sup>16</sup>        |
| 97C→A                   | Q33X                                      | Truncated,<br>non-functional protein                          | Homozygous                                        | <sup>17</sup>        |
| 113A→G                  | Y38C                                      | Misfolded protein,<br>↓ surface expression,<br>↓ phagocytosis | Compound<br>Heterozygous                          | <sup>5, 11, 18</sup> |
| 197C→T                  | T66M                                      | Misfolded protein,<br>↓ surface expression,<br>↓ phagocytosis | Homozygous<br>(FTDL)<br><br>Heterozygous<br>(FTD) | <sup>11, 12</sup>    |
| 257A→T                  | D86V                                      | Impaired Glycosylation<br>↓ surface expression                | Compound<br>heterozygous                          | <sup>14, 19</sup>    |
| 286C→A                  | T96K                                      | ↑ lipoprotein binding                                         | ND                                                | <sup>5, 18</sup>     |

|                                         |       |                                                                   |            |                                        |
|-----------------------------------------|-------|-------------------------------------------------------------------|------------|----------------------------------------|
|                                         |       | ↑ signaling                                                       |            |                                        |
| 598G→A                                  | W198X | Truncated protein                                                 | Homozygous | <sup>20</sup>                          |
| 632C→T                                  | L211P | Signaling equivalent to WT                                        | ND         | <sup>5, 18</sup>                       |
| <b>Parkinson's Disease</b>              |       |                                                                   |            |                                        |
| 140C → T                                | R47H  | Impaired signaling<br>↓Lipoprotein binding<br>↓Lipoprotein uptake | ND         | (+) <sup>21</sup><br>(-) <sup>22</sup> |
| <b>ALS</b>                              |       |                                                                   |            |                                        |
| 140C → T                                | R47H  | Impaired signaling<br>↓Lipoprotein binding<br>↓Lipoprotein uptake | ND         | (+) <sup>23</sup>                      |
| <b>Inconclusive Disease Association</b> |       |                                                                   |            |                                        |
|                                         | R52H  | ↓surface expression<br>↓binding to some ligands                   |            | <sup>5, 9, 24</sup>                    |
|                                         | R62C  | ↓surface expression<br>↓Activation by ligands                     |            | <sup>5, 24</sup>                       |
|                                         | R136W |                                                                   |            | <sup>24</sup>                          |
|                                         | R136Q |                                                                   |            | <sup>24</sup>                          |
|                                         | E151K |                                                                   |            | <sup>24</sup>                          |
|                                         | W191X | Stop-gain variant,<br>predicted truncation                        |            | <sup>9, 24</sup>                       |

1. Klunemann, H.H. *et al.* The genetic causes of basal ganglia calcification, dementia, and bone cysts: DAP12 and TREM2. *Neurology* **64**, 1502-1507 (2005).

2. Lu, Y., Liu, W. & Wang, X. TREM2 variants and risk of Alzheimer's disease: a meta-analysis. *Neurol Sci* **36**, 1881-1888 (2015).
3. Wang, Y. *et al.* TREM2 lipid sensing sustains the microglial response in an Alzheimer's disease model. *Cell* **160**, 1061-1071 (2015).
4. Song, W.M. *et al.* Humanized TREM2 mice reveal microglia-intrinsic and -extrinsic effects of R47H polymorphism. *The Journal of experimental medicine* (2018).
5. Song, W. *et al.* Alzheimer's disease-associated TREM2 variants exhibit either decreased or increased ligand-dependent activation. *Alzheimers Dement* **13**, 381-387 (2017).
6. Guerreiro, R. *et al.* TREM2 variants in Alzheimer's disease. *N Engl J Med* **368**, 117-127 (2013).
7. Jiang, T. *et al.* A rare coding variant in TREM2 increases risk for Alzheimer's disease in Han Chinese. *Neurobiol Aging* **42**, 217 e211-213 (2016).
8. Thornton, P. *et al.* TREM2 shedding by cleavage at the H157-S158 bond is accelerated for the Alzheimer's disease-associated H157Y variant. *EMBO Mol Med* **9**, 1366-1378 (2017).
9. Jin, S.C. *et al.* TREM2 is associated with increased risk for Alzheimer's disease in African Americans. *Mol Neurodegener* **10**, 19 (2015).
10. Paloneva, J. *et al.* Mutations in two genes encoding different subunits of a receptor signaling complex result in an identical disease phenotype. *Am J Hum Genet* **71**, 656-662 (2002).
11. Park, J.S. *et al.* Disease-Associated Mutations of TREM2 Alter the Processing of N-Linked Oligosaccharides in the Golgi Apparatus. *Traffic* **16**, 510-518 (2015).
12. Kleinberger, G. *et al.* TREM2 mutations implicated in neurodegeneration impair cell surface transport and phagocytosis. *Sci Transl Med* **6**, 243ra286 (2014).
13. Yeh, F.L., Wang, Y., Tom, I., Gonzalez, L.C. & Sheng, M. TREM2 Binds to Apolipoproteins, Including APOE and CLU/APOJ, and Thereby Facilitates Uptake of Amyloid-Beta by Microglia. *Neuron* **91**, 328-340 (2016).

14. Sirkis, D.W., Aparicio, R.E. & Schekman, R. Neurodegeneration-associated mutant TREM2 proteins abortively cycle between the ER and ER-Golgi intermediate compartment. *Mol Biol Cell* **28**, 2723-2733 (2017).
15. Numasawa, Y. *et al.* Nasu-Hakola disease with a splicing mutation of TREM2 in a Japanese family. *Eur J Neurol* **18**, 1179-1183 (2011).
16. Chouery, E. *et al.* Mutations in TREM2 lead to pure early-onset dementia without bone cysts. *Hum Mutat* **29**, E194-204 (2008).
17. Guerreiro, R.J. *et al.* Using exome sequencing to reveal mutations in TREM2 presenting as a frontotemporal dementia-like syndrome without bone involvement. *JAMA Neurol* **70**, 78-84 (2013).
18. Thelen, M. *et al.* Investigation of the role of rare TREM2 variants in frontotemporal dementia subtypes. *Neurobiol Aging* **35**, 2657 e2613-2657 e2619 (2014).
19. Guerreiro, R. *et al.* Novel compound heterozygous mutation in TREM2 found in a Turkish frontotemporal dementia-like family. *Neurobiol Aging* **34**, 2890 e2891-2895 (2013).
20. Giraldo, M. *et al.* Variants in triggering receptor expressed on myeloid cells 2 are associated with both behavioral variant frontotemporal lobar degeneration and Alzheimer's disease. *Neurobiol Aging* **34**, 2077 e2011-2078 (2013).
21. Rayaprolu, S. *et al.* TREM2 in neurodegeneration: evidence for association of the p.R47H variant with frontotemporal dementia and Parkinson's disease. *Mol Neurodegener* **8**, 19 (2013).
22. Lill, C.M. *et al.* The role of TREM2 R47H as a risk factor for Alzheimer's disease, frontotemporal lobar degeneration, amyotrophic lateral sclerosis, and Parkinson's disease. *Alzheimers Dement* **11**, 1407-1416 (2015).
23. Cady, J. *et al.* TREM2 variant p.R47H as a risk factor for sporadic amyotrophic lateral sclerosis. *JAMA Neurol* **71**, 449-453 (2014).
24. Jin, S.C. *et al.* Coding variants in TREM2 increase risk for Alzheimer's disease. *Hum Mol Genet* **23**, 5838-5846 (2014).
